# Supplementary material for: Vasohibin-2 modulates tumor onset in the gastrointestinal tract by normalizing tumor angiogenesis
Source: PubMed Central journal article supplement (PMC4113181; doi:10.1186/1476-4598-13-99), 2014-05-04

Figure S1

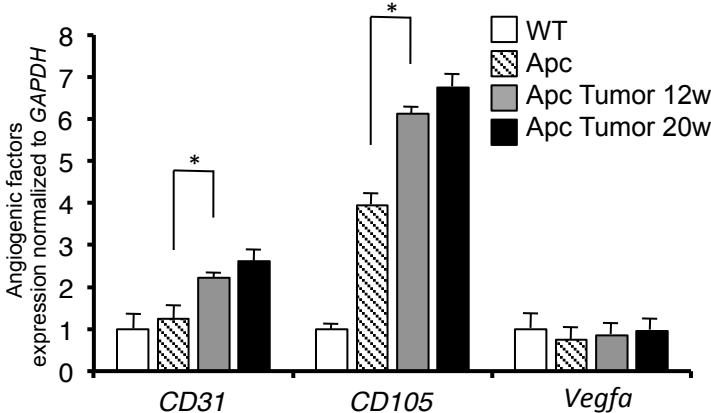

Supplement: 1476-4598-13-99-S1.pdf [file 1476-4598-13-99-S1.pdf]
